# Supplementary material for: Portable, low cost and sensitive cavity enhanced absorption (CEA) detection
Source: Royal Society of Chemistry journal article supplement (doi:10.1039/d0an01852j), 2020-10-27
Supplement: d0an01852j1.pdf [file d0an01852j1.pdf]

## Electronic Supplementary Information (ESI)

### Portable, Low Cost and Sensitive Cavity Enhanced Absorption (CEA) Detection

Andrew Teggert<sup>a</sup>, Harish Datta<sup>a,b</sup>, Stephen McIntosh<sup>c</sup>, Barry Warden<sup>c</sup>, Simon Bateson<sup>d</sup>, Fathi Abugchem<sup>d</sup> and Zulfiqur Ali<sup>d†</sup>,

<sup>a</sup>Department of Clinical Biochemistry, James Cook University Hospital, Middlesbrough TS4 3BW, UK

<sup>b</sup>Institute of Cellular Medicine, The Medical School, Newcastle University, Newcastle-upon-Tyne NE2 4HH, UK

<sup>c</sup>Wideblue Ltd, Kelvin Campus, West of Scotland Science Park, Glasgow, G20 0SP

<sup>d</sup>Healthcare Innovation Centre, School of Health and Life Sciences, Teesside University, Middlesbrough, Tees Valley, TS1 3BX, UK

Corresponding author: Z. Ali<sup>†</sup> (z.ali@tees.ac.uk)

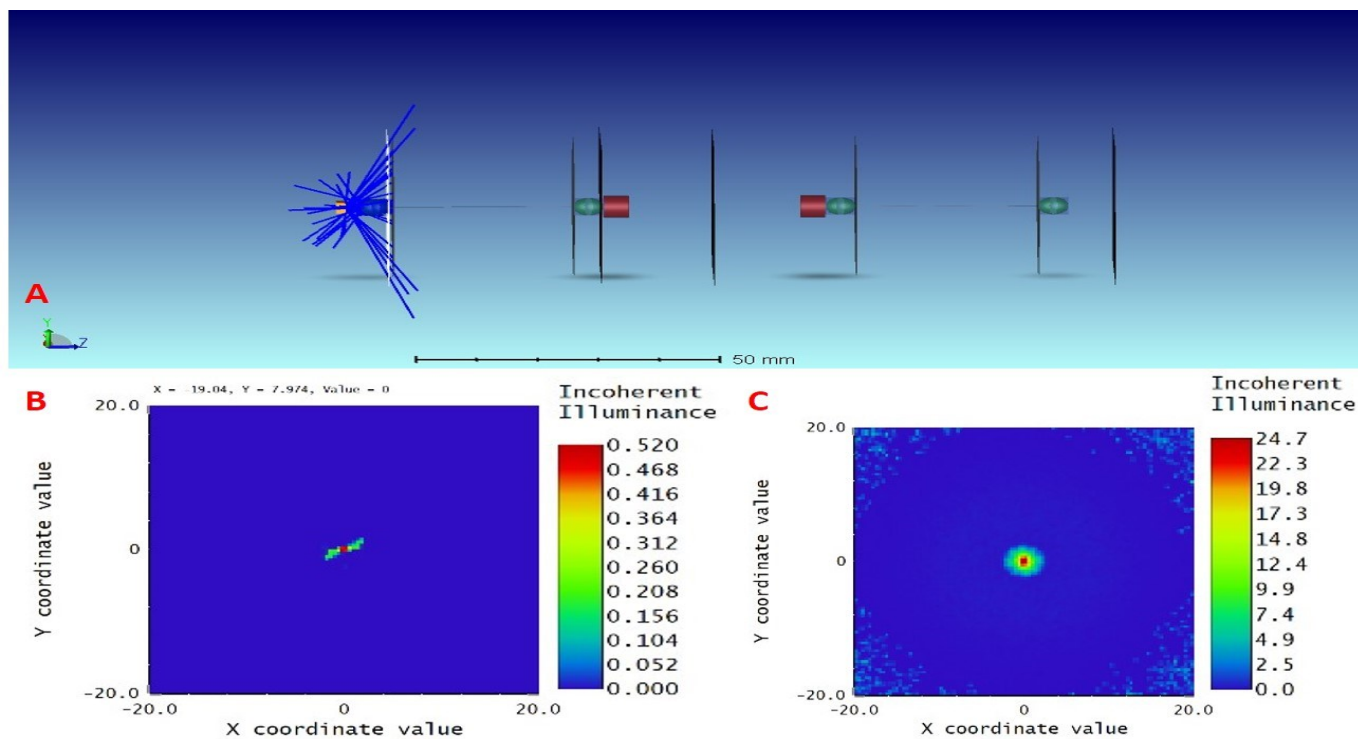

**Fig. S1** (A) Simulation of a fibre source, including ball lenses for collimation with the optical cavity shown as two red rectangles (B) plot showing the light intensity using a fibre optic coupled broadband light source and (C) Plot showing the light output for the same model using a high powered LED and collimation without fibre coupling.
